# Supplementary material for: A green approach for the synthesis of novel Ag3PO4/SnO2/porcine bone and its exploitation as a catalyst in the photodegradation of lignosulfonate into alkyl acids
Source: Royal Society of Chemistry journal article supplement (doi:10.1039/c8ra04962a), 2018-01-01
Supplement: c8ra04962a1.pdf [file c8ra04962a1.pdf]

## Supporting Information

# **A Green Approach for the Synthesis of Novel Ag<sub>3</sub>PO<sub>4</sub>/SnO<sub>2</sub>/Porcine Bone and Its Exploitation as a Catalyst in the Photodegradation of Lignosulfonate into Alkyl Acids**

Kai Chen, Mengdie Cao, Cong Ding\*<sup>[a]</sup> and Xinsheng Zheng\*<sup>[a]</sup>

<sup>a</sup> Department of Chemistry, College of Science, Huazhong Agricultural University, Wuhan  
430070, P. R. China.

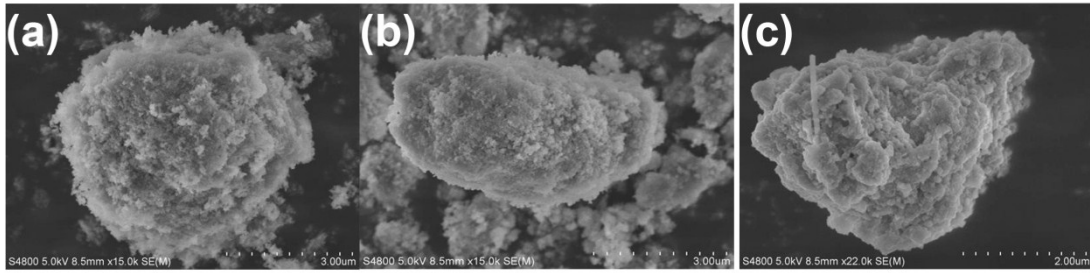

**Figure S1** SEM images of (a) porcine bone treated with 500 °C calcination; (b) SnO<sub>2</sub>/porcine bone; (c) Ag<sub>3</sub>PO<sub>4</sub>/SnO<sub>2</sub>/porcine bone.

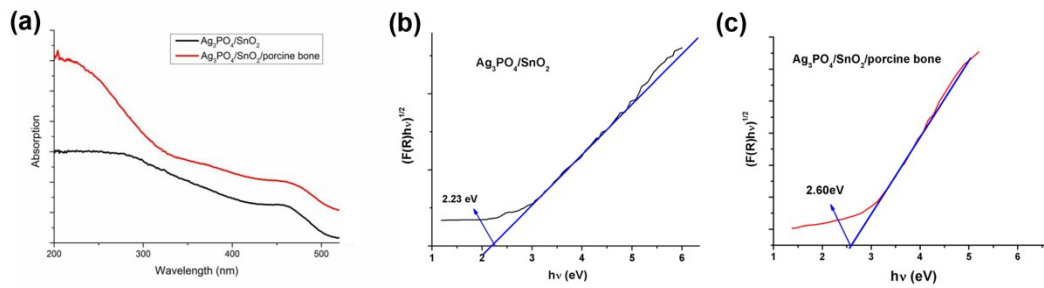

**Figure S2** (a) UV-Vis diffuser reflectance absorption spectra of Ag<sub>3</sub>PO<sub>4</sub>/SnO<sub>2</sub>, Ag<sub>3</sub>PO<sub>4</sub>/SnO<sub>2</sub>/porcine bone;  $E_g$  value measurement using Tauc plot: (b) Ag<sub>3</sub>PO<sub>4</sub>/SnO<sub>2</sub> and (c) Ag<sub>3</sub>PO<sub>4</sub>/SnO<sub>2</sub>/porcine bone.

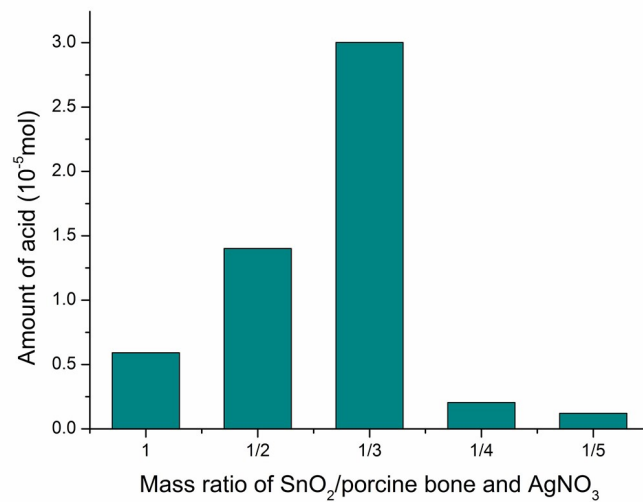

**Figure S3** The amount of acid generated in the photocatalytic reaction using catalyst prepared in different mass ratio. The mass ratio of SnO<sub>2</sub> /porcine bone and AgNO<sub>3</sub> is 1/1, 1/2, 1/3, 1/4, and 1/5, respectively.

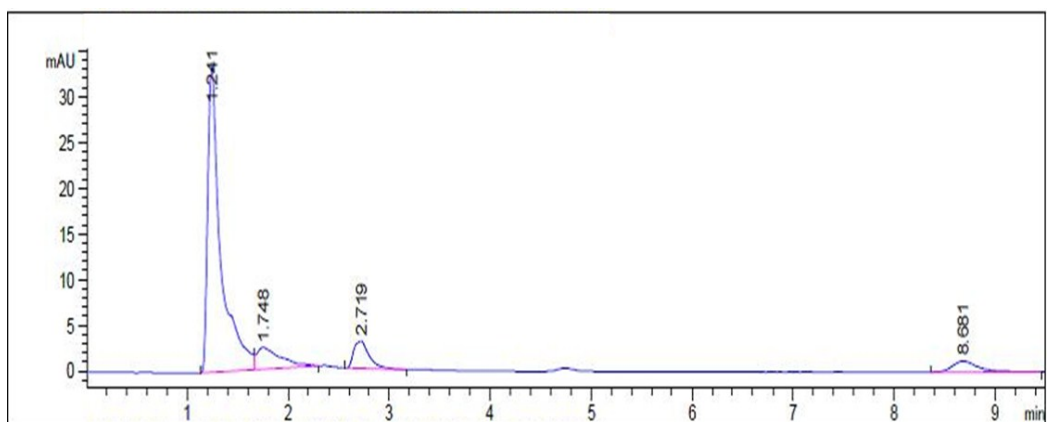

**Figure S4** The degradation products analyzed by HPLC (High Performance Liquid Chromatography)
